# Supplementary material
Source: PubMed Central journal article supplement (PMC2859042)

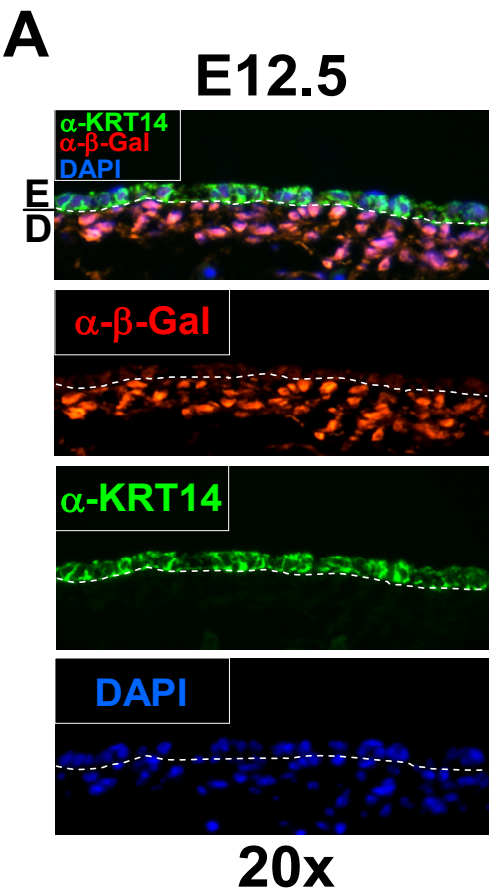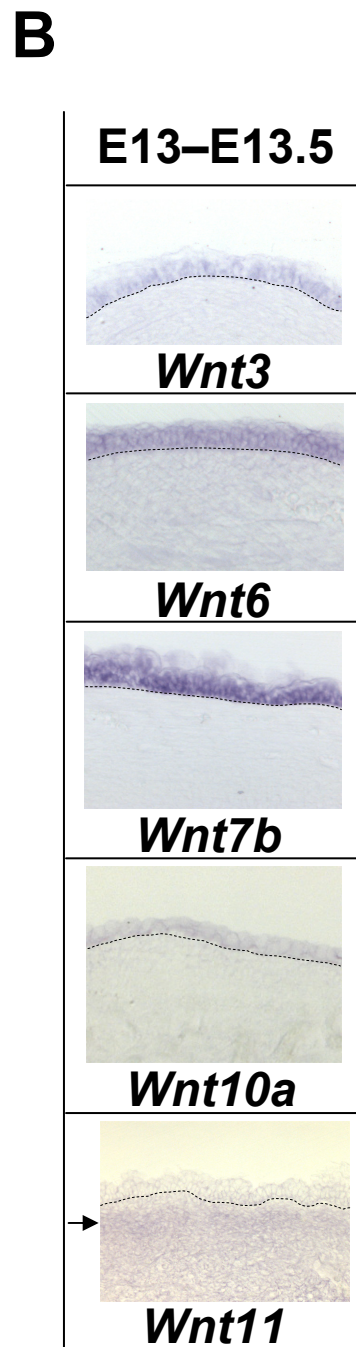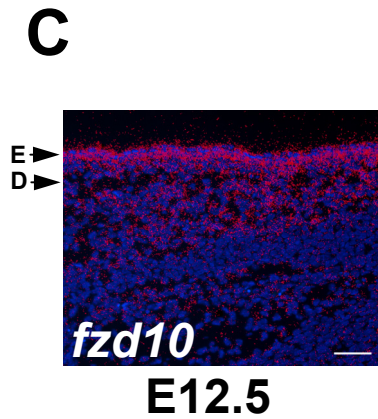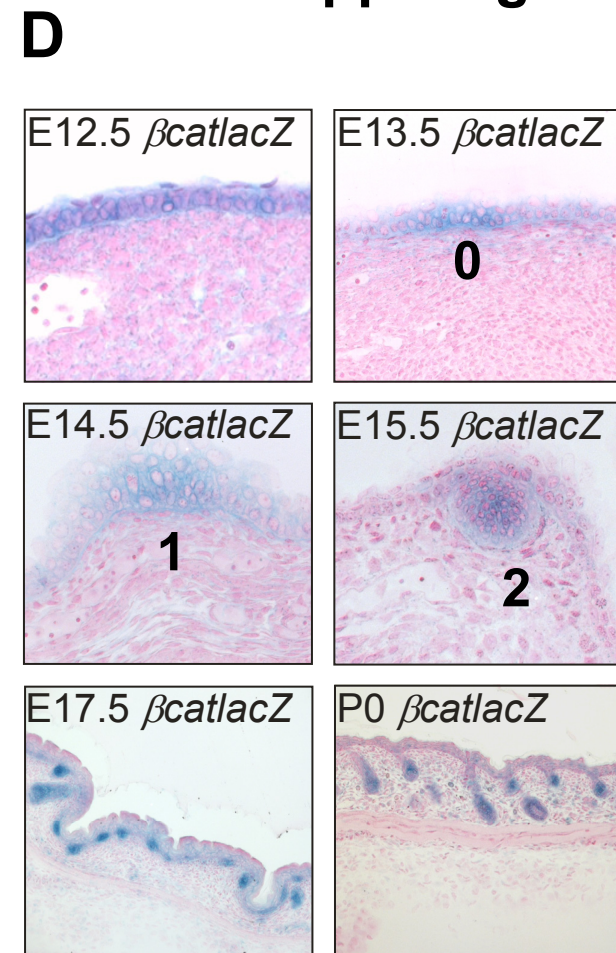

Supplement: NIHMS119896-supplement-Supplementary_Figure_S1.pdf [file NIHMS119896-supplement-Supplementary_Figure_S1.pdf]

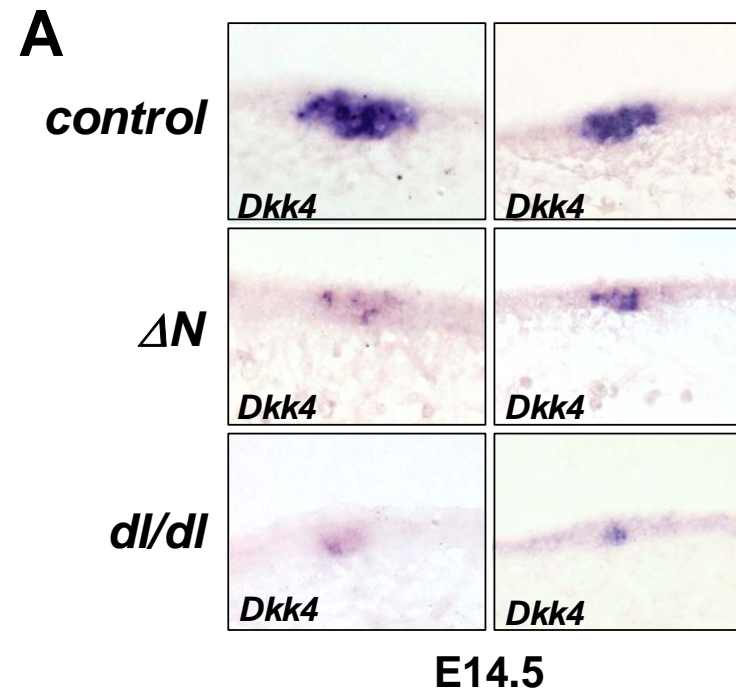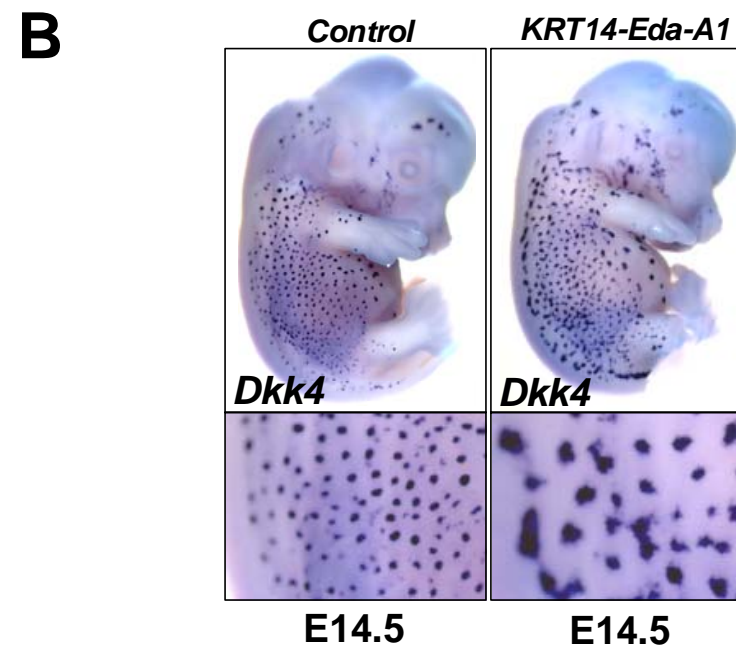

Supplement: NIHMS119896-supplement-Supplementary_Figure_S2.pdf [file NIHMS119896-supplement-Supplementary_Figure_S2.pdf]

Suppl. Fig. S3

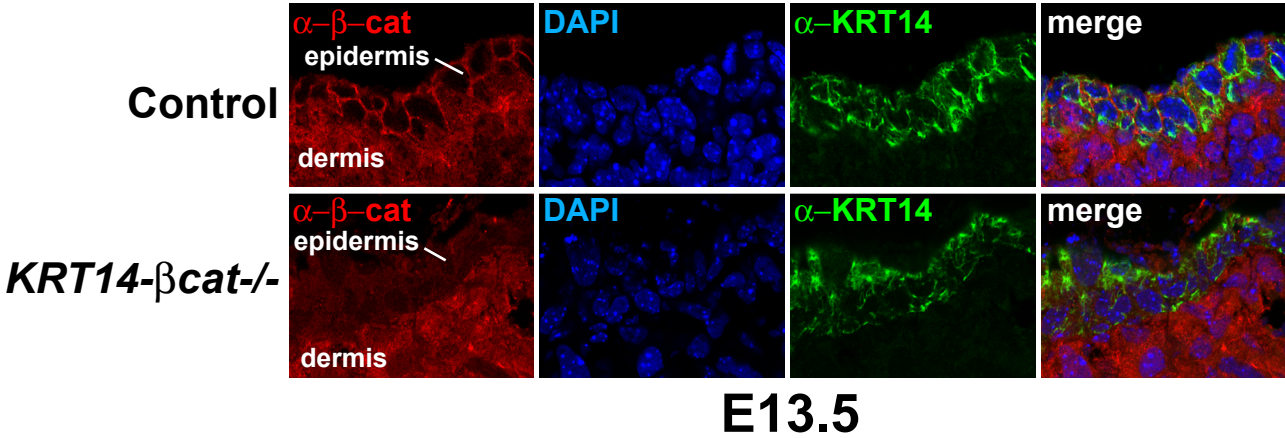

Supplement: NIHMS119896-supplement-Supplementary_Figure_S3.pdf [file NIHMS119896-supplement-Supplementary_Figure_S3.pdf]

# Suppl. Fig. S4

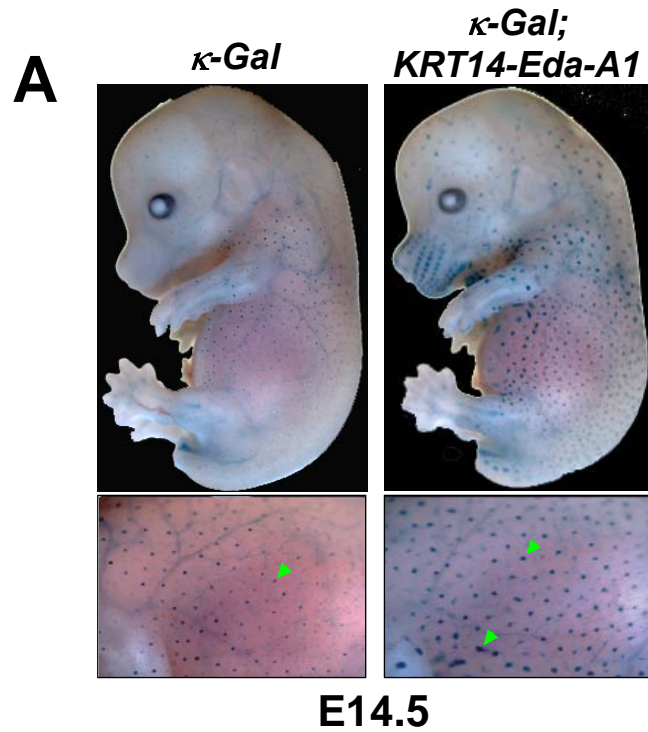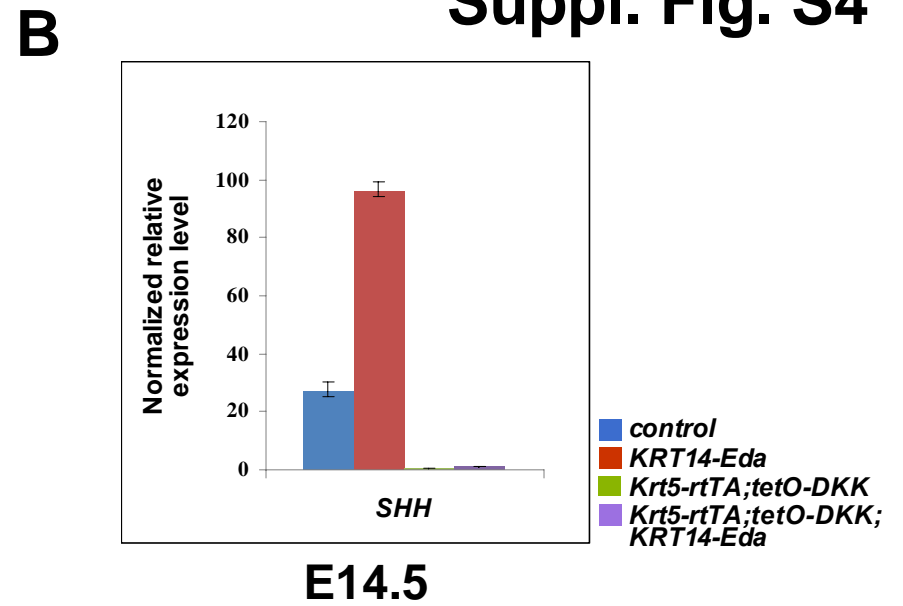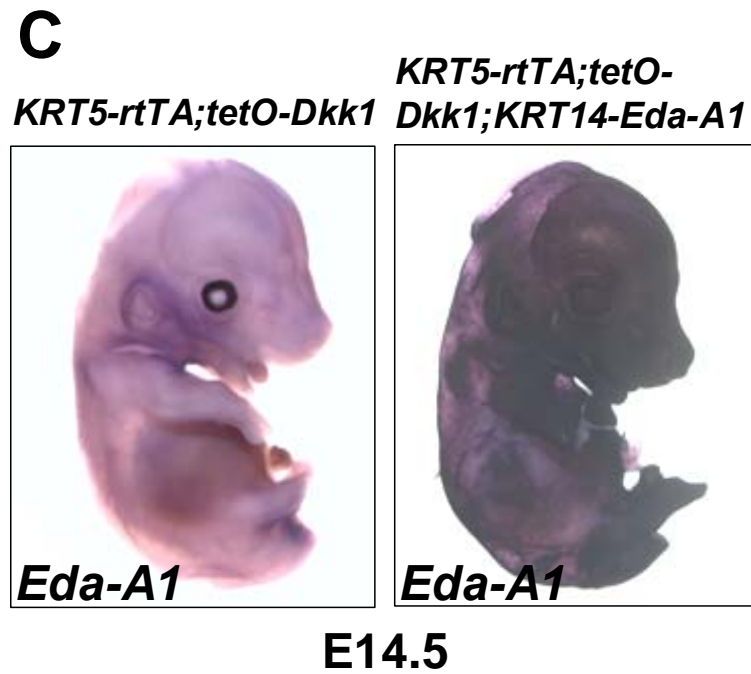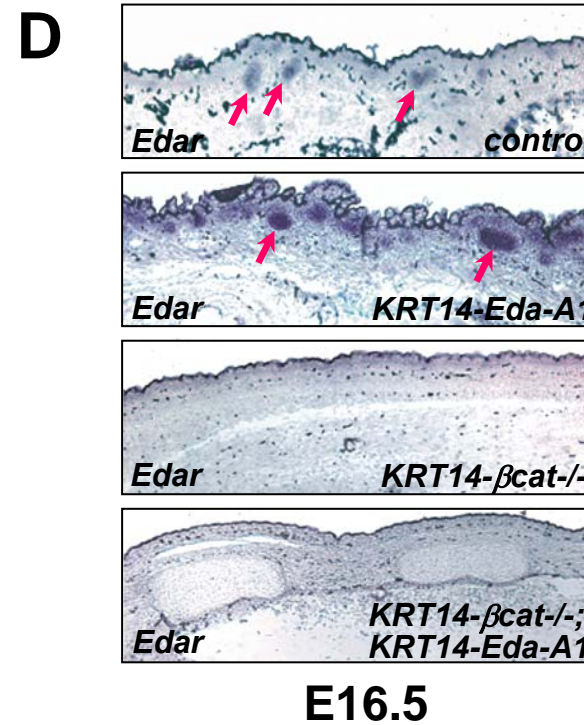

Supplement: NIHMS119896-supplement-Supplementary_Figure_S4.pdf [file NIHMS119896-supplement-Supplementary_Figure_S4.pdf]

**A**

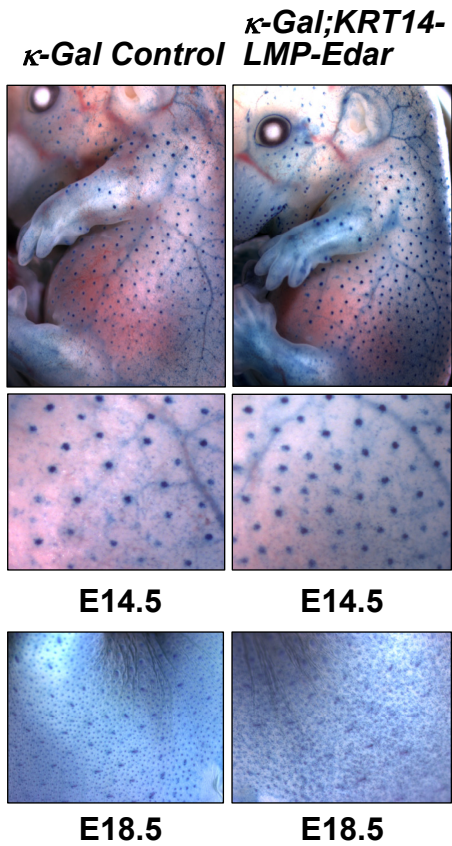

**B**

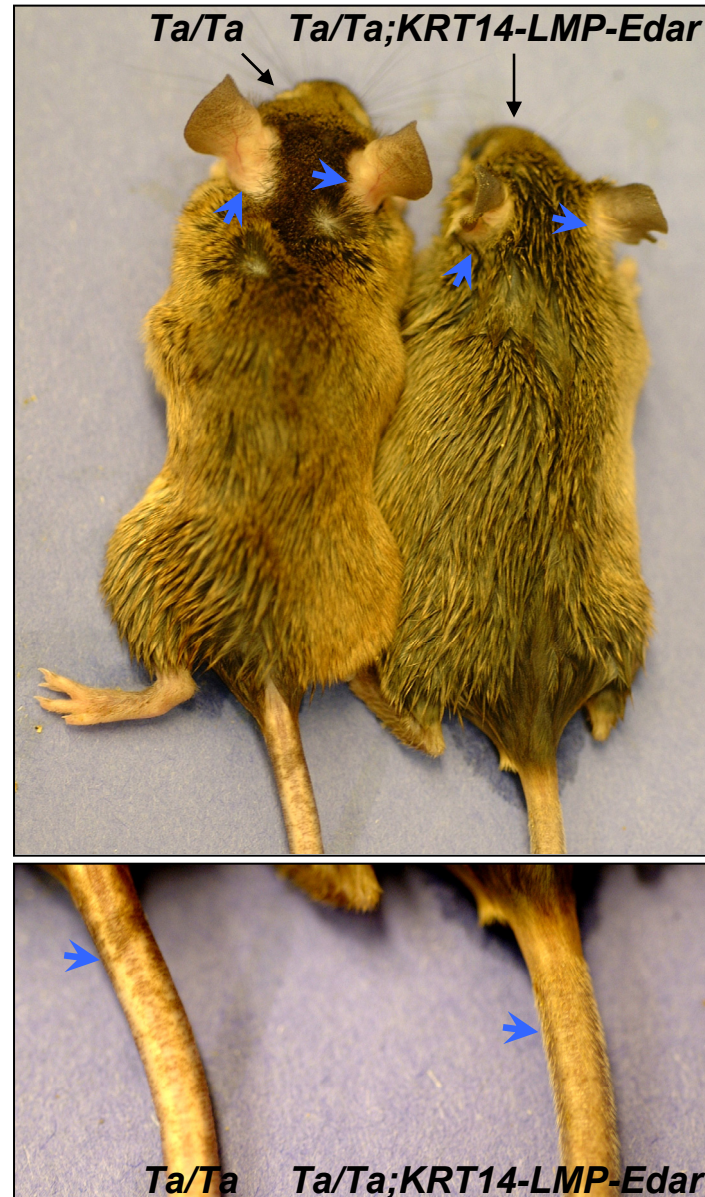

**C**

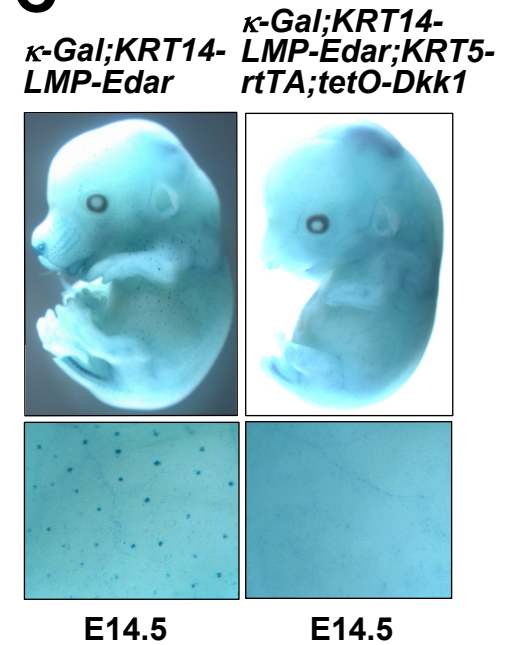

Supplement: NIHMS119896-supplement-Supplementary_Figure_S5.pdf [file NIHMS119896-supplement-Supplementary_Figure_S5.pdf]

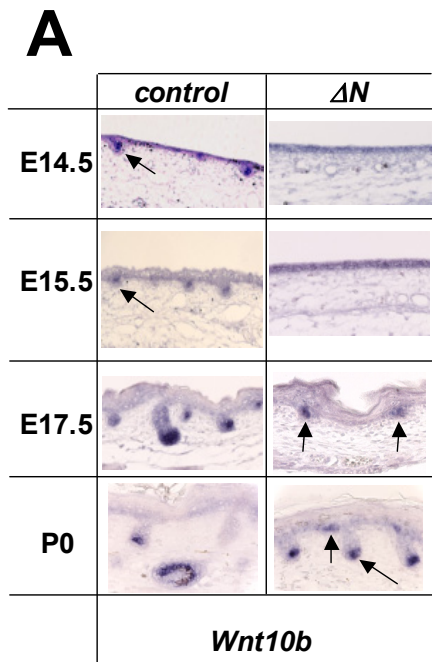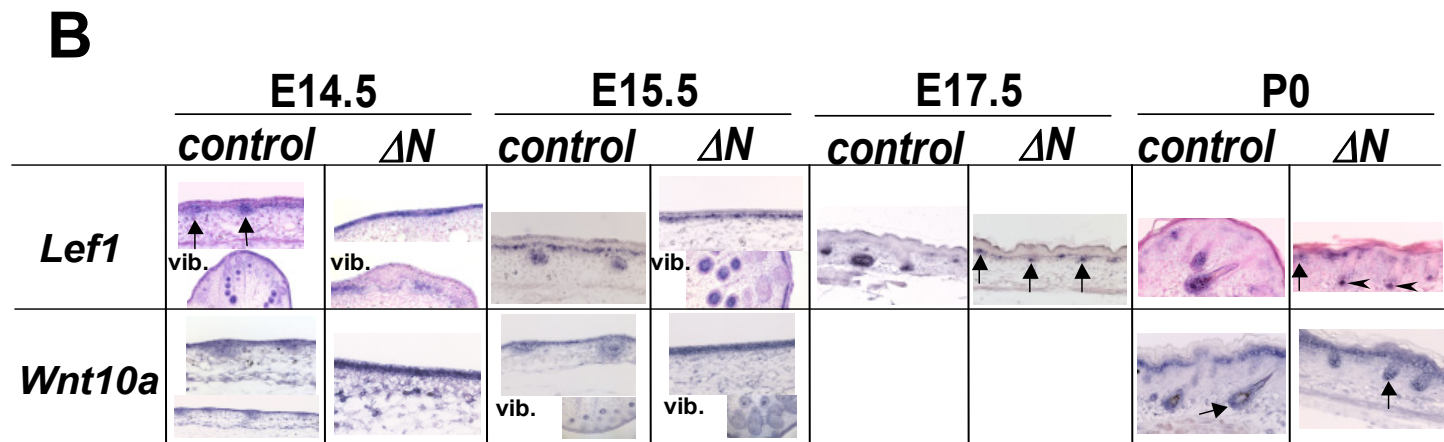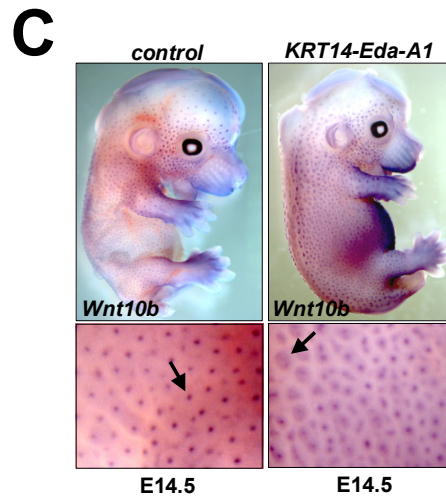

Supplement: NIHMS119896-supplement-Supplementary_Figure_S6.pdf [file NIHMS119896-supplement-Supplementary_Figure_S6.pdf]
